# Supplementary material
Source: MDPI journal article supplement (https://www.mdpi.com/search?q=catalysts-10-00123)
Supplement: s001 [file catalysts-10-00123-s001.pdf]

# Supporting Information

## Determining the location of $\text{Co}^{2+}$ in zeolites by UV-vis diffuse reflection spectroscopy – a critical view

Andrea Bellmann<sup>1,2</sup>, Christine Rautenberg<sup>1</sup>, Ursula Bentrup<sup>1,\*</sup> and Angelika Brückner<sup>1,\*</sup>

<sup>1</sup> Leibniz-Institut für Katalyse e.V. (LIKAT) Albert-Einstein-Str. 29a, 18059 Rostock, Germany

<sup>2</sup> Trinseo Deutschland GmbH, Street E17, 06258 Schkopau, Germany

\* Correspondence: [ursula.bentrup@catalysis.de](mailto:ursula.bentrup@catalysis.de), Tel.: +49-381-1281-268, [angelika.brueckner@catalysis.de](mailto:angelika.brueckner@catalysis.de)

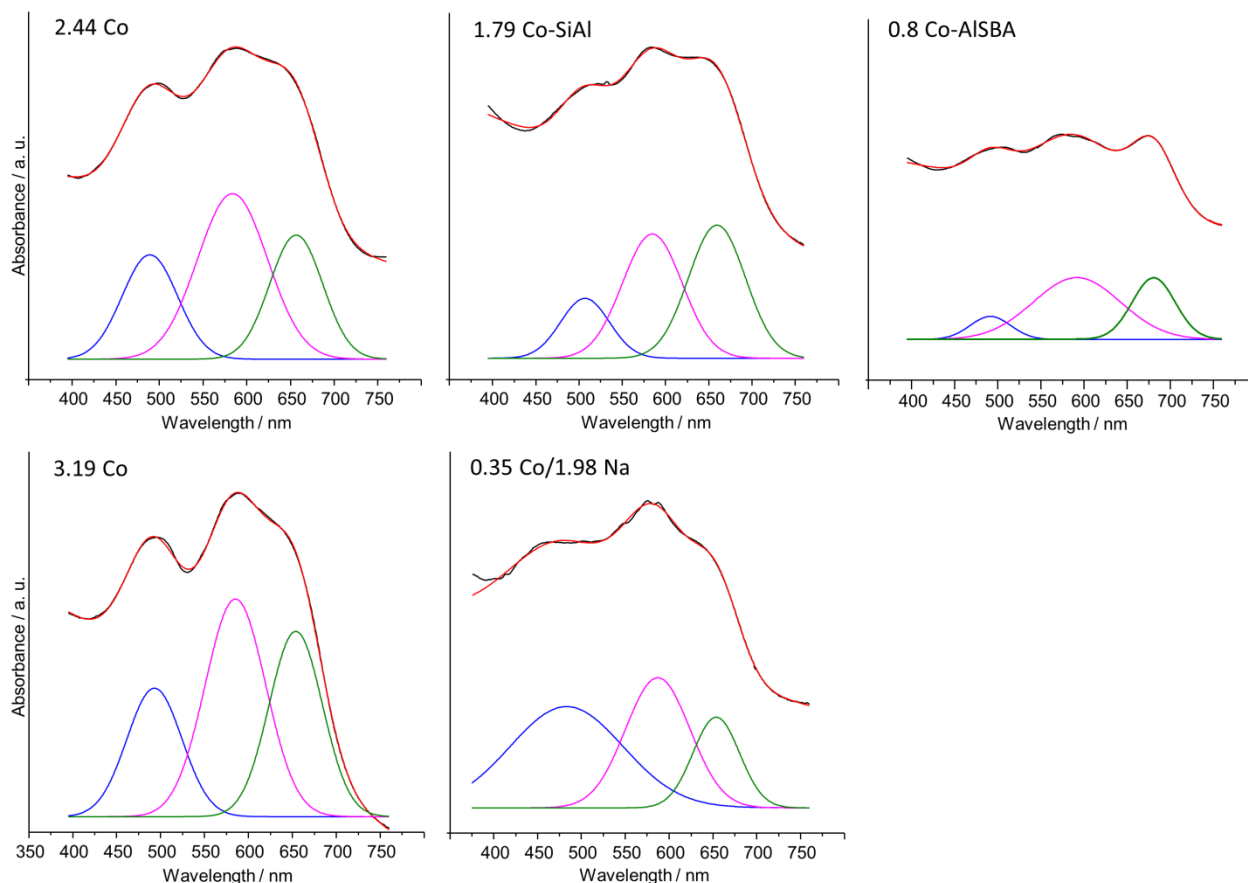

**Figure S1.** Deconvoluted UV-vis spectra measured in diffuse reflection mode at room temperature after heating the samples at 400°C in He for 30 min.
